# Supplementary material for: Environmental Regulation, Upgrading of Industrial Structure and Economic Fluctuation
Source: Preprints.org preprint supplement (doi:10.20944/preprints201811.0319.v1), 2018-11-13
Supplement: Supplementary file 1 [file supplementary]

# Figures

Figure 1. Threshold and confidence interval of technological Innovation as threshold variable(Industrial structure rationalization model)

Figure 2. Threshold and confidence interval of technological Innovation as threshold variable(Advanced industrial structure model)
